# Supplementary material
Source: publisher figshare collection journal article supplement (https://tandf.figshare.com/articles/dataset/_/13395536)
Supplement: Supplementary file 1 [file 1]

**A Experiment 1**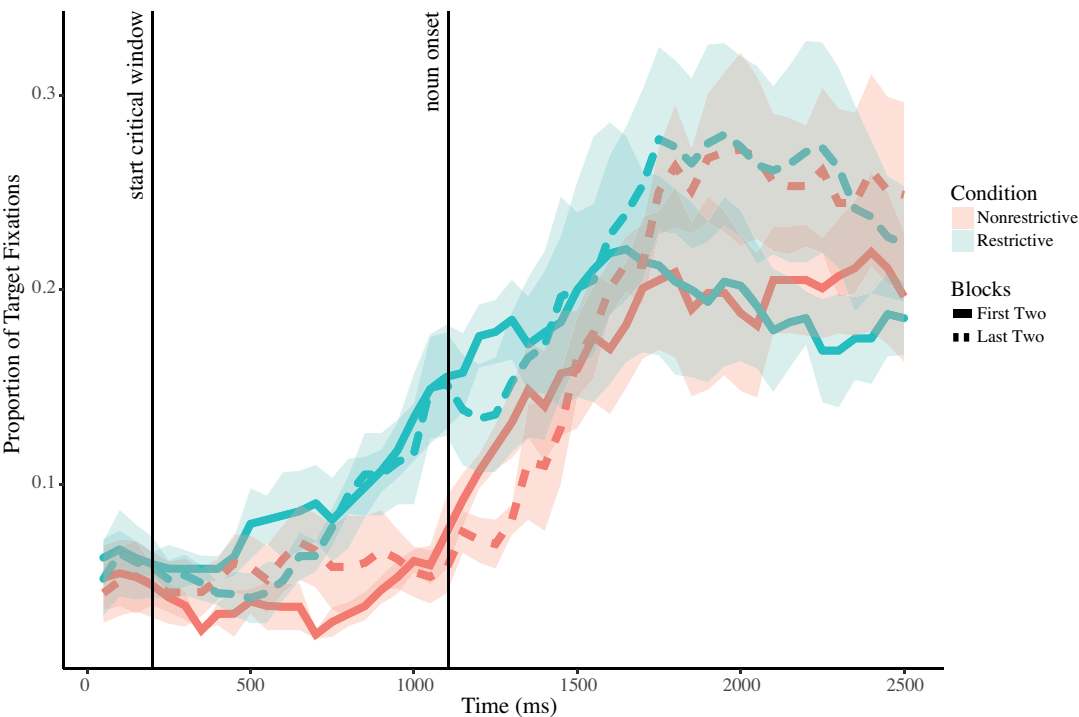**B Experiment 3 (+ Fillers)**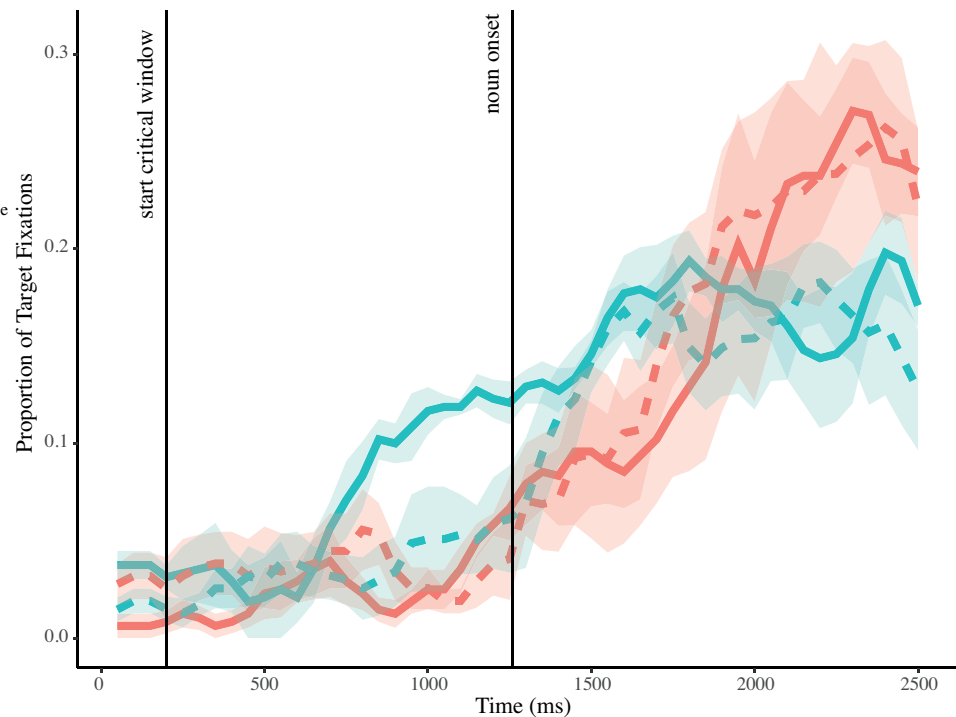

*Supplementary Figure 1.* Mean proportions of target fixations for the first two scenes compared to the last two scenes for Experiment 1 (Panel A) and Experiment 3 (Panel B). The figure illustrates an order effect in Experiment 3 but no order effect in Experiment 1. Error clouds represent standard error.
